# Supplementary material for: Pediatric prognostic models predicting inhospital child mortality in resource‐limited settings: An external validation study
Source: PubMed Central journal article supplement (PMC10460931; doi:10.1002/hsr2.1433), 2023-08-27
Supplement: HSR2-6-e1433-s002.pdf [file HSR2-6-e1433-s002.pdf]

## Paediatric Admission Record – Paediatric Ward

|                                                 |                                                       |                                      |                                                         |                                                       |                   |
|-------------------------------------------------|-------------------------------------------------------|--------------------------------------|---------------------------------------------------------|-------------------------------------------------------|-------------------|
| <b>Name</b>                                     |                                                       | <b>IP No.</b>                        |                                                         | <b>Ward</b>                                           |                   |
| Contact (Tel)                                   |                                                       | Relation                             |                                                         | DOB                                                   | dd/mm/yyyy        |
| Admission Date                                  | dd /mm / yyyy                                         | Sex                                  | M <input type="checkbox"/> / F <input type="checkbox"/> | Age                                                   | years months days |
| Subcounty/<br>Constituency                      |                                                       | Location                             |                                                         | Sub-location                                          |                   |
| Village                                         |                                                       | Nearest Health Facility              |                                                         | Nearest School                                        |                   |
| Is this first admission since birth?            | Y <input type="checkbox"/> N <input type="checkbox"/> | No of previous admissions            |                                                         | Date of last admission                                | dd/mm/yyyy        |
| Re-admission to <u>this</u> hospital?           | Y <input type="checkbox"/> N <input type="checkbox"/> | Discharged <1 month ago              |                                                         | Y <input type="checkbox"/> N <input type="checkbox"/> |                   |
| Is child referred from another health facility? | Y <input type="checkbox"/> N <input type="checkbox"/> | Date first treated in other facility |                                                         | dd/mm/yyyy                                            |                   |
| <b>Presenting Complaints</b>                    |                                                       |                                      |                                                         |                                                       |                   |

### History

|               |    |                        |    |                  |  |                  |  |                         |  |
|---------------|----|------------------------|----|------------------|--|------------------|--|-------------------------|--|
| <b>Weight</b> |    | <b>Height / Length</b> |    | <b>WHZ score</b> |  | <b>MUAC (cm)</b> |  | <b>Head Circum (cm)</b> |  |
|               | Kg |                        | cm |                  |  |                  |  |                         |  |

| Length of illness                                | days                                                                                           |                            | <b>Immunization</b>                                                                                                                                                                                                                                                                                                                                                                                                                                                                                                                                                                                                                                                                                                                                                                                                                                                                                                                                                                                                                                                                                                                                                                                                                                                                                                                                                                                                                                                                                                                                                                                                                                                                                                                                                                                                                                                                                                                                                                                                                                                                                                                                                                                                                                                                                                                                                                                                                                                                              |         |          |               |     |                                                                                           |               |              |                                                                                           |               |                 |                                                                                           |               |        |                                                                                           |               |                 |                                                                                           |               |        |                                                                                           |               |                 |                                                                                           |               |     |                                                                                           |               |                  |                                                                                           |               |                  |                                                                                           |               |                  |                                                                                           |               |                  |                                                                                           |               |           |                                                                                           |               |              |                                                                                           |               |
|--------------------------------------------------|------------------------------------------------------------------------------------------------|----------------------------|--------------------------------------------------------------------------------------------------------------------------------------------------------------------------------------------------------------------------------------------------------------------------------------------------------------------------------------------------------------------------------------------------------------------------------------------------------------------------------------------------------------------------------------------------------------------------------------------------------------------------------------------------------------------------------------------------------------------------------------------------------------------------------------------------------------------------------------------------------------------------------------------------------------------------------------------------------------------------------------------------------------------------------------------------------------------------------------------------------------------------------------------------------------------------------------------------------------------------------------------------------------------------------------------------------------------------------------------------------------------------------------------------------------------------------------------------------------------------------------------------------------------------------------------------------------------------------------------------------------------------------------------------------------------------------------------------------------------------------------------------------------------------------------------------------------------------------------------------------------------------------------------------------------------------------------------------------------------------------------------------------------------------------------------------------------------------------------------------------------------------------------------------------------------------------------------------------------------------------------------------------------------------------------------------------------------------------------------------------------------------------------------------------------------------------------------------------------------------------------------------|---------|----------|---------------|-----|-------------------------------------------------------------------------------------------|---------------|--------------|-------------------------------------------------------------------------------------------|---------------|-----------------|-------------------------------------------------------------------------------------------|---------------|--------|-------------------------------------------------------------------------------------------|---------------|-----------------|-------------------------------------------------------------------------------------------|---------------|--------|-------------------------------------------------------------------------------------------|---------------|-----------------|-------------------------------------------------------------------------------------------|---------------|-----|-------------------------------------------------------------------------------------------|---------------|------------------|-------------------------------------------------------------------------------------------|---------------|------------------|-------------------------------------------------------------------------------------------|---------------|------------------|-------------------------------------------------------------------------------------------|---------------|------------------|-------------------------------------------------------------------------------------------|---------------|-----------|-------------------------------------------------------------------------------------------|---------------|--------------|-------------------------------------------------------------------------------------------|---------------|
| Fever – No. of days =                            | Y <input type="checkbox"/>                                                                     | N <input type="checkbox"/> | Vaccination card available? Y <input type="checkbox"/> N <input type="checkbox"/>                                                                                                                                                                                                                                                                                                                                                                                                                                                                                                                                                                                                                                                                                                                                                                                                                                                                                                                                                                                                                                                                                                                                                                                                                                                                                                                                                                                                                                                                                                                                                                                                                                                                                                                                                                                                                                                                                                                                                                                                                                                                                                                                                                                                                                                                                                                                                                                                                |         |          |               |     |                                                                                           |               |              |                                                                                           |               |                 |                                                                                           |               |        |                                                                                           |               |                 |                                                                                           |               |        |                                                                                           |               |                 |                                                                                           |               |     |                                                                                           |               |                  |                                                                                           |               |                  |                                                                                           |               |                  |                                                                                           |               |                  |                                                                                           |               |           |                                                                                           |               |              |                                                                                           |               |
| Cough– No. of days =                             | Y <input type="checkbox"/>                                                                     | N <input type="checkbox"/> | Has child received any vaccinations since birth? Y <input type="checkbox"/> N <input type="checkbox"/>                                                                                                                                                                                                                                                                                                                                                                                                                                                                                                                                                                                                                                                                                                                                                                                                                                                                                                                                                                                                                                                                                                                                                                                                                                                                                                                                                                                                                                                                                                                                                                                                                                                                                                                                                                                                                                                                                                                                                                                                                                                                                                                                                                                                                                                                                                                                                                                           |         |          |               |     |                                                                                           |               |              |                                                                                           |               |                 |                                                                                           |               |        |                                                                                           |               |                 |                                                                                           |               |        |                                                                                           |               |                 |                                                                                           |               |     |                                                                                           |               |                  |                                                                                           |               |                  |                                                                                           |               |                  |                                                                                           |               |                  |                                                                                           |               |           |                                                                                           |               |              |                                                                                           |               |
| Cough > 2 weeks                                  | Y <input type="checkbox"/>                                                                     | N <input type="checkbox"/> | <table border="1" style="width: 100%; border-collapse: collapse;"> <thead> <tr> <th style="width: 30%;">Vaccine</th> <th style="width: 40%;">Received</th> <th style="width: 30%;">Date received</th> </tr> </thead> <tbody> <tr> <td>BCG</td> <td>Y <input type="checkbox"/> N <input type="checkbox"/> Don't Know <input type="checkbox"/></td> <td>dd /mm / yyyy</td> </tr> <tr> <td>OPV 0(Birth)</td> <td>Y <input type="checkbox"/> N <input type="checkbox"/> Don't Know <input type="checkbox"/></td> <td>dd /mm / yyyy</td> </tr> <tr> <td>OPV/Penta/PCV 1</td> <td>Y <input type="checkbox"/> N <input type="checkbox"/> Don't Know <input type="checkbox"/></td> <td>dd /mm / yyyy</td> </tr> <tr> <td>Rota 1</td> <td>Y <input type="checkbox"/> N <input type="checkbox"/> Don't Know <input type="checkbox"/></td> <td>dd /mm / yyyy</td> </tr> <tr> <td>OPV/Penta/PCV 2</td> <td>Y <input type="checkbox"/> N <input type="checkbox"/> Don't Know <input type="checkbox"/></td> <td>dd /mm / yyyy</td> </tr> <tr> <td>Rota 2</td> <td>Y <input type="checkbox"/> N <input type="checkbox"/> Don't Know <input type="checkbox"/></td> <td>dd /mm / yyyy</td> </tr> <tr> <td>OPV/Penta/PCV 3</td> <td>Y <input type="checkbox"/> N <input type="checkbox"/> Don't Know <input type="checkbox"/></td> <td>dd /mm / yyyy</td> </tr> <tr> <td>IPV</td> <td>Y <input type="checkbox"/> N <input type="checkbox"/> Don't Know <input type="checkbox"/></td> <td>dd /mm / yyyy</td> </tr> <tr> <td>RTS,S 1(Malaria)</td> <td>Y <input type="checkbox"/> N <input type="checkbox"/> Don't Know <input type="checkbox"/></td> <td>dd /mm / yyyy</td> </tr> <tr> <td>RTS,S 2(Malaria)</td> <td>Y <input type="checkbox"/> N <input type="checkbox"/> Don't Know <input type="checkbox"/></td> <td>dd /mm / yyyy</td> </tr> <tr> <td>RTS,S 3(Malaria)</td> <td>Y <input type="checkbox"/> N <input type="checkbox"/> Don't Know <input type="checkbox"/></td> <td>dd /mm / yyyy</td> </tr> <tr> <td>RTS,S 4(Malaria)</td> <td>Y <input type="checkbox"/> N <input type="checkbox"/> Don't Know <input type="checkbox"/></td> <td>dd /mm / yyyy</td> </tr> <tr> <td>Measles 1</td> <td>Y <input type="checkbox"/> N <input type="checkbox"/> Don't Know <input type="checkbox"/></td> <td>dd /mm / yyyy</td> </tr> <tr> <td>Measles 2/MR</td> <td>Y <input type="checkbox"/> N <input type="checkbox"/> Don't Know <input type="checkbox"/></td> <td>dd /mm / yyyy</td> </tr> </tbody> </table> | Vaccine | Received | Date received | BCG | Y <input type="checkbox"/> N <input type="checkbox"/> Don't Know <input type="checkbox"/> | dd /mm / yyyy | OPV 0(Birth) | Y <input type="checkbox"/> N <input type="checkbox"/> Don't Know <input type="checkbox"/> | dd /mm / yyyy | OPV/Penta/PCV 1 | Y <input type="checkbox"/> N <input type="checkbox"/> Don't Know <input type="checkbox"/> | dd /mm / yyyy | Rota 1 | Y <input type="checkbox"/> N <input type="checkbox"/> Don't Know <input type="checkbox"/> | dd /mm / yyyy | OPV/Penta/PCV 2 | Y <input type="checkbox"/> N <input type="checkbox"/> Don't Know <input type="checkbox"/> | dd /mm / yyyy | Rota 2 | Y <input type="checkbox"/> N <input type="checkbox"/> Don't Know <input type="checkbox"/> | dd /mm / yyyy | OPV/Penta/PCV 3 | Y <input type="checkbox"/> N <input type="checkbox"/> Don't Know <input type="checkbox"/> | dd /mm / yyyy | IPV | Y <input type="checkbox"/> N <input type="checkbox"/> Don't Know <input type="checkbox"/> | dd /mm / yyyy | RTS,S 1(Malaria) | Y <input type="checkbox"/> N <input type="checkbox"/> Don't Know <input type="checkbox"/> | dd /mm / yyyy | RTS,S 2(Malaria) | Y <input type="checkbox"/> N <input type="checkbox"/> Don't Know <input type="checkbox"/> | dd /mm / yyyy | RTS,S 3(Malaria) | Y <input type="checkbox"/> N <input type="checkbox"/> Don't Know <input type="checkbox"/> | dd /mm / yyyy | RTS,S 4(Malaria) | Y <input type="checkbox"/> N <input type="checkbox"/> Don't Know <input type="checkbox"/> | dd /mm / yyyy | Measles 1 | Y <input type="checkbox"/> N <input type="checkbox"/> Don't Know <input type="checkbox"/> | dd /mm / yyyy | Measles 2/MR | Y <input type="checkbox"/> N <input type="checkbox"/> Don't Know <input type="checkbox"/> | dd /mm / yyyy |
| Vaccine                                          | Received                                                                                       | Date received              |                                                                                                                                                                                                                                                                                                                                                                                                                                                                                                                                                                                                                                                                                                                                                                                                                                                                                                                                                                                                                                                                                                                                                                                                                                                                                                                                                                                                                                                                                                                                                                                                                                                                                                                                                                                                                                                                                                                                                                                                                                                                                                                                                                                                                                                                                                                                                                                                                                                                                                  |         |          |               |     |                                                                                           |               |              |                                                                                           |               |                 |                                                                                           |               |        |                                                                                           |               |                 |                                                                                           |               |        |                                                                                           |               |                 |                                                                                           |               |     |                                                                                           |               |                  |                                                                                           |               |                  |                                                                                           |               |                  |                                                                                           |               |                  |                                                                                           |               |           |                                                                                           |               |              |                                                                                           |               |
| BCG                                              | Y <input type="checkbox"/> N <input type="checkbox"/> Don't Know <input type="checkbox"/>      | dd /mm / yyyy              |                                                                                                                                                                                                                                                                                                                                                                                                                                                                                                                                                                                                                                                                                                                                                                                                                                                                                                                                                                                                                                                                                                                                                                                                                                                                                                                                                                                                                                                                                                                                                                                                                                                                                                                                                                                                                                                                                                                                                                                                                                                                                                                                                                                                                                                                                                                                                                                                                                                                                                  |         |          |               |     |                                                                                           |               |              |                                                                                           |               |                 |                                                                                           |               |        |                                                                                           |               |                 |                                                                                           |               |        |                                                                                           |               |                 |                                                                                           |               |     |                                                                                           |               |                  |                                                                                           |               |                  |                                                                                           |               |                  |                                                                                           |               |                  |                                                                                           |               |           |                                                                                           |               |              |                                                                                           |               |
| OPV 0(Birth)                                     | Y <input type="checkbox"/> N <input type="checkbox"/> Don't Know <input type="checkbox"/>      | dd /mm / yyyy              |                                                                                                                                                                                                                                                                                                                                                                                                                                                                                                                                                                                                                                                                                                                                                                                                                                                                                                                                                                                                                                                                                                                                                                                                                                                                                                                                                                                                                                                                                                                                                                                                                                                                                                                                                                                                                                                                                                                                                                                                                                                                                                                                                                                                                                                                                                                                                                                                                                                                                                  |         |          |               |     |                                                                                           |               |              |                                                                                           |               |                 |                                                                                           |               |        |                                                                                           |               |                 |                                                                                           |               |        |                                                                                           |               |                 |                                                                                           |               |     |                                                                                           |               |                  |                                                                                           |               |                  |                                                                                           |               |                  |                                                                                           |               |                  |                                                                                           |               |           |                                                                                           |               |              |                                                                                           |               |
| OPV/Penta/PCV 1                                  | Y <input type="checkbox"/> N <input type="checkbox"/> Don't Know <input type="checkbox"/>      | dd /mm / yyyy              |                                                                                                                                                                                                                                                                                                                                                                                                                                                                                                                                                                                                                                                                                                                                                                                                                                                                                                                                                                                                                                                                                                                                                                                                                                                                                                                                                                                                                                                                                                                                                                                                                                                                                                                                                                                                                                                                                                                                                                                                                                                                                                                                                                                                                                                                                                                                                                                                                                                                                                  |         |          |               |     |                                                                                           |               |              |                                                                                           |               |                 |                                                                                           |               |        |                                                                                           |               |                 |                                                                                           |               |        |                                                                                           |               |                 |                                                                                           |               |     |                                                                                           |               |                  |                                                                                           |               |                  |                                                                                           |               |                  |                                                                                           |               |                  |                                                                                           |               |           |                                                                                           |               |              |                                                                                           |               |
| Rota 1                                           | Y <input type="checkbox"/> N <input type="checkbox"/> Don't Know <input type="checkbox"/>      | dd /mm / yyyy              |                                                                                                                                                                                                                                                                                                                                                                                                                                                                                                                                                                                                                                                                                                                                                                                                                                                                                                                                                                                                                                                                                                                                                                                                                                                                                                                                                                                                                                                                                                                                                                                                                                                                                                                                                                                                                                                                                                                                                                                                                                                                                                                                                                                                                                                                                                                                                                                                                                                                                                  |         |          |               |     |                                                                                           |               |              |                                                                                           |               |                 |                                                                                           |               |        |                                                                                           |               |                 |                                                                                           |               |        |                                                                                           |               |                 |                                                                                           |               |     |                                                                                           |               |                  |                                                                                           |               |                  |                                                                                           |               |                  |                                                                                           |               |                  |                                                                                           |               |           |                                                                                           |               |              |                                                                                           |               |
| OPV/Penta/PCV 2                                  | Y <input type="checkbox"/> N <input type="checkbox"/> Don't Know <input type="checkbox"/>      | dd /mm / yyyy              |                                                                                                                                                                                                                                                                                                                                                                                                                                                                                                                                                                                                                                                                                                                                                                                                                                                                                                                                                                                                                                                                                                                                                                                                                                                                                                                                                                                                                                                                                                                                                                                                                                                                                                                                                                                                                                                                                                                                                                                                                                                                                                                                                                                                                                                                                                                                                                                                                                                                                                  |         |          |               |     |                                                                                           |               |              |                                                                                           |               |                 |                                                                                           |               |        |                                                                                           |               |                 |                                                                                           |               |        |                                                                                           |               |                 |                                                                                           |               |     |                                                                                           |               |                  |                                                                                           |               |                  |                                                                                           |               |                  |                                                                                           |               |                  |                                                                                           |               |           |                                                                                           |               |              |                                                                                           |               |
| Rota 2                                           | Y <input type="checkbox"/> N <input type="checkbox"/> Don't Know <input type="checkbox"/>      | dd /mm / yyyy              |                                                                                                                                                                                                                                                                                                                                                                                                                                                                                                                                                                                                                                                                                                                                                                                                                                                                                                                                                                                                                                                                                                                                                                                                                                                                                                                                                                                                                                                                                                                                                                                                                                                                                                                                                                                                                                                                                                                                                                                                                                                                                                                                                                                                                                                                                                                                                                                                                                                                                                  |         |          |               |     |                                                                                           |               |              |                                                                                           |               |                 |                                                                                           |               |        |                                                                                           |               |                 |                                                                                           |               |        |                                                                                           |               |                 |                                                                                           |               |     |                                                                                           |               |                  |                                                                                           |               |                  |                                                                                           |               |                  |                                                                                           |               |                  |                                                                                           |               |           |                                                                                           |               |              |                                                                                           |               |
| OPV/Penta/PCV 3                                  | Y <input type="checkbox"/> N <input type="checkbox"/> Don't Know <input type="checkbox"/>      | dd /mm / yyyy              |                                                                                                                                                                                                                                                                                                                                                                                                                                                                                                                                                                                                                                                                                                                                                                                                                                                                                                                                                                                                                                                                                                                                                                                                                                                                                                                                                                                                                                                                                                                                                                                                                                                                                                                                                                                                                                                                                                                                                                                                                                                                                                                                                                                                                                                                                                                                                                                                                                                                                                  |         |          |               |     |                                                                                           |               |              |                                                                                           |               |                 |                                                                                           |               |        |                                                                                           |               |                 |                                                                                           |               |        |                                                                                           |               |                 |                                                                                           |               |     |                                                                                           |               |                  |                                                                                           |               |                  |                                                                                           |               |                  |                                                                                           |               |                  |                                                                                           |               |           |                                                                                           |               |              |                                                                                           |               |
| IPV                                              | Y <input type="checkbox"/> N <input type="checkbox"/> Don't Know <input type="checkbox"/>      | dd /mm / yyyy              |                                                                                                                                                                                                                                                                                                                                                                                                                                                                                                                                                                                                                                                                                                                                                                                                                                                                                                                                                                                                                                                                                                                                                                                                                                                                                                                                                                                                                                                                                                                                                                                                                                                                                                                                                                                                                                                                                                                                                                                                                                                                                                                                                                                                                                                                                                                                                                                                                                                                                                  |         |          |               |     |                                                                                           |               |              |                                                                                           |               |                 |                                                                                           |               |        |                                                                                           |               |                 |                                                                                           |               |        |                                                                                           |               |                 |                                                                                           |               |     |                                                                                           |               |                  |                                                                                           |               |                  |                                                                                           |               |                  |                                                                                           |               |                  |                                                                                           |               |           |                                                                                           |               |              |                                                                                           |               |
| RTS,S 1(Malaria)                                 | Y <input type="checkbox"/> N <input type="checkbox"/> Don't Know <input type="checkbox"/>      | dd /mm / yyyy              |                                                                                                                                                                                                                                                                                                                                                                                                                                                                                                                                                                                                                                                                                                                                                                                                                                                                                                                                                                                                                                                                                                                                                                                                                                                                                                                                                                                                                                                                                                                                                                                                                                                                                                                                                                                                                                                                                                                                                                                                                                                                                                                                                                                                                                                                                                                                                                                                                                                                                                  |         |          |               |     |                                                                                           |               |              |                                                                                           |               |                 |                                                                                           |               |        |                                                                                           |               |                 |                                                                                           |               |        |                                                                                           |               |                 |                                                                                           |               |     |                                                                                           |               |                  |                                                                                           |               |                  |                                                                                           |               |                  |                                                                                           |               |                  |                                                                                           |               |           |                                                                                           |               |              |                                                                                           |               |
| RTS,S 2(Malaria)                                 | Y <input type="checkbox"/> N <input type="checkbox"/> Don't Know <input type="checkbox"/>      | dd /mm / yyyy              |                                                                                                                                                                                                                                                                                                                                                                                                                                                                                                                                                                                                                                                                                                                                                                                                                                                                                                                                                                                                                                                                                                                                                                                                                                                                                                                                                                                                                                                                                                                                                                                                                                                                                                                                                                                                                                                                                                                                                                                                                                                                                                                                                                                                                                                                                                                                                                                                                                                                                                  |         |          |               |     |                                                                                           |               |              |                                                                                           |               |                 |                                                                                           |               |        |                                                                                           |               |                 |                                                                                           |               |        |                                                                                           |               |                 |                                                                                           |               |     |                                                                                           |               |                  |                                                                                           |               |                  |                                                                                           |               |                  |                                                                                           |               |                  |                                                                                           |               |           |                                                                                           |               |              |                                                                                           |               |
| RTS,S 3(Malaria)                                 | Y <input type="checkbox"/> N <input type="checkbox"/> Don't Know <input type="checkbox"/>      | dd /mm / yyyy              |                                                                                                                                                                                                                                                                                                                                                                                                                                                                                                                                                                                                                                                                                                                                                                                                                                                                                                                                                                                                                                                                                                                                                                                                                                                                                                                                                                                                                                                                                                                                                                                                                                                                                                                                                                                                                                                                                                                                                                                                                                                                                                                                                                                                                                                                                                                                                                                                                                                                                                  |         |          |               |     |                                                                                           |               |              |                                                                                           |               |                 |                                                                                           |               |        |                                                                                           |               |                 |                                                                                           |               |        |                                                                                           |               |                 |                                                                                           |               |     |                                                                                           |               |                  |                                                                                           |               |                  |                                                                                           |               |                  |                                                                                           |               |                  |                                                                                           |               |           |                                                                                           |               |              |                                                                                           |               |
| RTS,S 4(Malaria)                                 | Y <input type="checkbox"/> N <input type="checkbox"/> Don't Know <input type="checkbox"/>      | dd /mm / yyyy              |                                                                                                                                                                                                                                                                                                                                                                                                                                                                                                                                                                                                                                                                                                                                                                                                                                                                                                                                                                                                                                                                                                                                                                                                                                                                                                                                                                                                                                                                                                                                                                                                                                                                                                                                                                                                                                                                                                                                                                                                                                                                                                                                                                                                                                                                                                                                                                                                                                                                                                  |         |          |               |     |                                                                                           |               |              |                                                                                           |               |                 |                                                                                           |               |        |                                                                                           |               |                 |                                                                                           |               |        |                                                                                           |               |                 |                                                                                           |               |     |                                                                                           |               |                  |                                                                                           |               |                  |                                                                                           |               |                  |                                                                                           |               |                  |                                                                                           |               |           |                                                                                           |               |              |                                                                                           |               |
| Measles 1                                        | Y <input type="checkbox"/> N <input type="checkbox"/> Don't Know <input type="checkbox"/>      | dd /mm / yyyy              |                                                                                                                                                                                                                                                                                                                                                                                                                                                                                                                                                                                                                                                                                                                                                                                                                                                                                                                                                                                                                                                                                                                                                                                                                                                                                                                                                                                                                                                                                                                                                                                                                                                                                                                                                                                                                                                                                                                                                                                                                                                                                                                                                                                                                                                                                                                                                                                                                                                                                                  |         |          |               |     |                                                                                           |               |              |                                                                                           |               |                 |                                                                                           |               |        |                                                                                           |               |                 |                                                                                           |               |        |                                                                                           |               |                 |                                                                                           |               |     |                                                                                           |               |                  |                                                                                           |               |                  |                                                                                           |               |                  |                                                                                           |               |                  |                                                                                           |               |           |                                                                                           |               |              |                                                                                           |               |
| Measles 2/MR                                     | Y <input type="checkbox"/> N <input type="checkbox"/> Don't Know <input type="checkbox"/>      | dd /mm / yyyy              |                                                                                                                                                                                                                                                                                                                                                                                                                                                                                                                                                                                                                                                                                                                                                                                                                                                                                                                                                                                                                                                                                                                                                                                                                                                                                                                                                                                                                                                                                                                                                                                                                                                                                                                                                                                                                                                                                                                                                                                                                                                                                                                                                                                                                                                                                                                                                                                                                                                                                                  |         |          |               |     |                                                                                           |               |              |                                                                                           |               |                 |                                                                                           |               |        |                                                                                           |               |                 |                                                                                           |               |        |                                                                                           |               |                 |                                                                                           |               |     |                                                                                           |               |                  |                                                                                           |               |                  |                                                                                           |               |                  |                                                                                           |               |                  |                                                                                           |               |           |                                                                                           |               |              |                                                                                           |               |
| Contact with TB /Chronic cough (last 12 months ) | Y <input type="checkbox"/>                                                                     | N <input type="checkbox"/> | Vitamin A given within last 6months? Y <input type="checkbox"/> N <input type="checkbox"/>                                                                                                                                                                                                                                                                                                                                                                                                                                                                                                                                                                                                                                                                                                                                                                                                                                                                                                                                                                                                                                                                                                                                                                                                                                                                                                                                                                                                                                                                                                                                                                                                                                                                                                                                                                                                                                                                                                                                                                                                                                                                                                                                                                                                                                                                                                                                                                                                       |         |          |               |     |                                                                                           |               |              |                                                                                           |               |                 |                                                                                           |               |        |                                                                                           |               |                 |                                                                                           |               |        |                                                                                           |               |                 |                                                                                           |               |     |                                                                                           |               |                  |                                                                                           |               |                  |                                                                                           |               |                  |                                                                                           |               |                  |                                                                                           |               |           |                                                                                           |               |              |                                                                                           |               |
| Difficulty breathing                             | Y <input type="checkbox"/>                                                                     | N <input type="checkbox"/> | <b>Birth/Antenatal History</b>                                                                                                                                                                                                                                                                                                                                                                                                                                                                                                                                                                                                                                                                                                                                                                                                                                                                                                                                                                                                                                                                                                                                                                                                                                                                                                                                                                                                                                                                                                                                                                                                                                                                                                                                                                                                                                                                                                                                                                                                                                                                                                                                                                                                                                                                                                                                                                                                                                                                   |         |          |               |     |                                                                                           |               |              |                                                                                           |               |                 |                                                                                           |               |        |                                                                                           |               |                 |                                                                                           |               |        |                                                                                           |               |                 |                                                                                           |               |     |                                                                                           |               |                  |                                                                                           |               |                  |                                                                                           |               |                  |                                                                                           |               |                  |                                                                                           |               |           |                                                                                           |               |              |                                                                                           |               |
| Diarrhoea No. of days =                          | Y <input type="checkbox"/>                                                                     | N <input type="checkbox"/> | Maternal PMTCT status: <input type="checkbox"/> Positive <input type="checkbox"/> Negative <input type="checkbox"/> Unknown                                                                                                                                                                                                                                                                                                                                                                                                                                                                                                                                                                                                                                                                                                                                                                                                                                                                                                                                                                                                                                                                                                                                                                                                                                                                                                                                                                                                                                                                                                                                                                                                                                                                                                                                                                                                                                                                                                                                                                                                                                                                                                                                                                                                                                                                                                                                                                      |         |          |               |     |                                                                                           |               |              |                                                                                           |               |                 |                                                                                           |               |        |                                                                                           |               |                 |                                                                                           |               |        |                                                                                           |               |                 |                                                                                           |               |     |                                                                                           |               |                  |                                                                                           |               |                  |                                                                                           |               |                  |                                                                                           |               |                  |                                                                                           |               |           |                                                                                           |               |              |                                                                                           |               |
| Diarrhoea > 14d                                  | Y <input type="checkbox"/>                                                                     | N <input type="checkbox"/> | <b>Growth and Development:</b>                                                                                                                                                                                                                                                                                                                                                                                                                                                                                                                                                                                                                                                                                                                                                                                                                                                                                                                                                                                                                                                                                                                                                                                                                                                                                                                                                                                                                                                                                                                                                                                                                                                                                                                                                                                                                                                                                                                                                                                                                                                                                                                                                                                                                                                                                                                                                                                                                                                                   |         |          |               |     |                                                                                           |               |              |                                                                                           |               |                 |                                                                                           |               |        |                                                                                           |               |                 |                                                                                           |               |        |                                                                                           |               |                 |                                                                                           |               |     |                                                                                           |               |                  |                                                                                           |               |                  |                                                                                           |               |                  |                                                                                           |               |                  |                                                                                           |               |           |                                                                                           |               |              |                                                                                           |               |
| Diarrhoea bloody                                 | Y <input type="checkbox"/>                                                                     | N <input type="checkbox"/> | <b>Family/Social history:</b>                                                                                                                                                                                                                                                                                                                                                                                                                                                                                                                                                                                                                                                                                                                                                                                                                                                                                                                                                                                                                                                                                                                                                                                                                                                                                                                                                                                                                                                                                                                                                                                                                                                                                                                                                                                                                                                                                                                                                                                                                                                                                                                                                                                                                                                                                                                                                                                                                                                                    |         |          |               |     |                                                                                           |               |              |                                                                                           |               |                 |                                                                                           |               |        |                                                                                           |               |                 |                                                                                           |               |        |                                                                                           |               |                 |                                                                                           |               |     |                                                                                           |               |                  |                                                                                           |               |                  |                                                                                           |               |                  |                                                                                           |               |                  |                                                                                           |               |           |                                                                                           |               |              |                                                                                           |               |
| Vomiting, No / 24hrs =                           | Y <input type="checkbox"/>                                                                     | N <input type="checkbox"/> | <b>Nutritional history:</b>                                                                                                                                                                                                                                                                                                                                                                                                                                                                                                                                                                                                                                                                                                                                                                                                                                                                                                                                                                                                                                                                                                                                                                                                                                                                                                                                                                                                                                                                                                                                                                                                                                                                                                                                                                                                                                                                                                                                                                                                                                                                                                                                                                                                                                                                                                                                                                                                                                                                      |         |          |               |     |                                                                                           |               |              |                                                                                           |               |                 |                                                                                           |               |        |                                                                                           |               |                 |                                                                                           |               |        |                                                                                           |               |                 |                                                                                           |               |     |                                                                                           |               |                  |                                                                                           |               |                  |                                                                                           |               |                  |                                                                                           |               |                  |                                                                                           |               |           |                                                                                           |               |              |                                                                                           |               |
| Vomits everything                                | Y <input type="checkbox"/>                                                                     | N <input type="checkbox"/> | <b>Review of Systems:</b>                                                                                                                                                                                                                                                                                                                                                                                                                                                                                                                                                                                                                                                                                                                                                                                                                                                                                                                                                                                                                                                                                                                                                                                                                                                                                                                                                                                                                                                                                                                                                                                                                                                                                                                                                                                                                                                                                                                                                                                                                                                                                                                                                                                                                                                                                                                                                                                                                                                                        |         |          |               |     |                                                                                           |               |              |                                                                                           |               |                 |                                                                                           |               |        |                                                                                           |               |                 |                                                                                           |               |        |                                                                                           |               |                 |                                                                                           |               |     |                                                                                           |               |                  |                                                                                           |               |                  |                                                                                           |               |                  |                                                                                           |               |                  |                                                                                           |               |           |                                                                                           |               |              |                                                                                           |               |
| Difficulty feeding                               | Y <input type="checkbox"/>                                                                     | N <input type="checkbox"/> | Respiratory including ENT                                                                                                                                                                                                                                                                                                                                                                                                                                                                                                                                                                                                                                                                                                                                                                                                                                                                                                                                                                                                                                                                                                                                                                                                                                                                                                                                                                                                                                                                                                                                                                                                                                                                                                                                                                                                                                                                                                                                                                                                                                                                                                                                                                                                                                                                                                                                                                                                                                                                        |         |          |               |     |                                                                                           |               |              |                                                                                           |               |                 |                                                                                           |               |        |                                                                                           |               |                 |                                                                                           |               |        |                                                                                           |               |                 |                                                                                           |               |     |                                                                                           |               |                  |                                                                                           |               |                  |                                                                                           |               |                  |                                                                                           |               |                  |                                                                                           |               |           |                                                                                           |               |              |                                                                                           |               |
| Convulsions<br>Number in last 24hrs = _____      | Y <input type="checkbox"/>                                                                     | N <input type="checkbox"/> | Cardiovascular                                                                                                                                                                                                                                                                                                                                                                                                                                                                                                                                                                                                                                                                                                                                                                                                                                                                                                                                                                                                                                                                                                                                                                                                                                                                                                                                                                                                                                                                                                                                                                                                                                                                                                                                                                                                                                                                                                                                                                                                                                                                                                                                                                                                                                                                                                                                                                                                                                                                                   |         |          |               |     |                                                                                           |               |              |                                                                                           |               |                 |                                                                                           |               |        |                                                                                           |               |                 |                                                                                           |               |        |                                                                                           |               |                 |                                                                                           |               |     |                                                                                           |               |                  |                                                                                           |               |                  |                                                                                           |               |                  |                                                                                           |               |                  |                                                                                           |               |           |                                                                                           |               |              |                                                                                           |               |
| Partial / focal fits?                            | Y <input type="checkbox"/>                                                                     | N <input type="checkbox"/> | Gastro-intestinal / Genitourinary                                                                                                                                                                                                                                                                                                                                                                                                                                                                                                                                                                                                                                                                                                                                                                                                                                                                                                                                                                                                                                                                                                                                                                                                                                                                                                                                                                                                                                                                                                                                                                                                                                                                                                                                                                                                                                                                                                                                                                                                                                                                                                                                                                                                                                                                                                                                                                                                                                                                |         |          |               |     |                                                                                           |               |              |                                                                                           |               |                 |                                                                                           |               |        |                                                                                           |               |                 |                                                                                           |               |        |                                                                                           |               |                 |                                                                                           |               |     |                                                                                           |               |                  |                                                                                           |               |                  |                                                                                           |               |                  |                                                                                           |               |                  |                                                                                           |               |           |                                                                                           |               |              |                                                                                           |               |
| Passing blood/tea/cola coloured urine?           | Y <input type="checkbox"/>                                                                     | N <input type="checkbox"/> |                                                                                                                                                                                                                                                                                                                                                                                                                                                                                                                                                                                                                                                                                                                                                                                                                                                                                                                                                                                                                                                                                                                                                                                                                                                                                                                                                                                                                                                                                                                                                                                                                                                                                                                                                                                                                                                                                                                                                                                                                                                                                                                                                                                                                                                                                                                                                                                                                                                                                                  |         |          |               |     |                                                                                           |               |              |                                                                                           |               |                 |                                                                                           |               |        |                                                                                           |               |                 |                                                                                           |               |        |                                                                                           |               |                 |                                                                                           |               |     |                                                                                           |               |                  |                                                                                           |               |                  |                                                                                           |               |                  |                                                                                           |               |                  |                                                                                           |               |           |                                                                                           |               |              |                                                                                           |               |
| Sleeps under mosquito net                        | Y <input type="checkbox"/>                                                                     | N <input type="checkbox"/> |                                                                                                                                                                                                                                                                                                                                                                                                                                                                                                                                                                                                                                                                                                                                                                                                                                                                                                                                                                                                                                                                                                                                                                                                                                                                                                                                                                                                                                                                                                                                                                                                                                                                                                                                                                                                                                                                                                                                                                                                                                                                                                                                                                                                                                                                                                                                                                                                                                                                                                  |         |          |               |     |                                                                                           |               |              |                                                                                           |               |                 |                                                                                           |               |        |                                                                                           |               |                 |                                                                                           |               |        |                                                                                           |               |                 |                                                                                           |               |     |                                                                                           |               |                  |                                                                                           |               |                  |                                                                                           |               |                  |                                                                                           |               |                  |                                                                                           |               |           |                                                                                           |               |              |                                                                                           |               |
| Pre-existing illness                             | None <input type="checkbox"/>                                                                  |                            |                                                                                                                                                                                                                                                                                                                                                                                                                                                                                                                                                                                                                                                                                                                                                                                                                                                                                                                                                                                                                                                                                                                                                                                                                                                                                                                                                                                                                                                                                                                                                                                                                                                                                                                                                                                                                                                                                                                                                                                                                                                                                                                                                                                                                                                                                                                                                                                                                                                                                                  |         |          |               |     |                                                                                           |               |              |                                                                                           |               |                 |                                                                                           |               |        |                                                                                           |               |                 |                                                                                           |               |        |                                                                                           |               |                 |                                                                                           |               |     |                                                                                           |               |                  |                                                                                           |               |                  |                                                                                           |               |                  |                                                                                           |               |                  |                                                                                           |               |           |                                                                                           |               |              |                                                                                           |               |
| Drugs taken last 2 weeks                         | None <input type="checkbox"/>                                                                  |                            |                                                                                                                                                                                                                                                                                                                                                                                                                                                                                                                                                                                                                                                                                                                                                                                                                                                                                                                                                                                                                                                                                                                                                                                                                                                                                                                                                                                                                                                                                                                                                                                                                                                                                                                                                                                                                                                                                                                                                                                                                                                                                                                                                                                                                                                                                                                                                                                                                                                                                                  |         |          |               |     |                                                                                           |               |              |                                                                                           |               |                 |                                                                                           |               |        |                                                                                           |               |                 |                                                                                           |               |        |                                                                                           |               |                 |                                                                                           |               |     |                                                                                           |               |                  |                                                                                           |               |                  |                                                                                           |               |                  |                                                                                           |               |                  |                                                                                           |               |           |                                                                                           |               |              |                                                                                           |               |
| Any vaccine reaction suspected?                  | Y <input type="checkbox"/> N <input type="checkbox"/><br>If yes, indicate most recent vaccine: |                            |                                                                                                                                                                                                                                                                                                                                                                                                                                                                                                                                                                                                                                                                                                                                                                                                                                                                                                                                                                                                                                                                                                                                                                                                                                                                                                                                                                                                                                                                                                                                                                                                                                                                                                                                                                                                                                                                                                                                                                                                                                                                                                                                                                                                                                                                                                                                                                                                                                                                                                  |         |          |               |     |                                                                                           |               |              |                                                                                           |               |                 |                                                                                           |               |        |                                                                                           |               |                 |                                                                                           |               |        |                                                                                           |               |                 |                                                                                           |               |     |                                                                                           |               |                  |                                                                                           |               |                  |                                                                                           |               |                  |                                                                                           |               |                  |                                                                                           |               |           |                                                                                           |               |              |                                                                                           |               |
| <b>Additional history of presenting illness;</b> |                                                                                                |                            |                                                                                                                                                                                                                                                                                                                                                                                                                                                                                                                                                                                                                                                                                                                                                                                                                                                                                                                                                                                                                                                                                                                                                                                                                                                                                                                                                                                                                                                                                                                                                                                                                                                                                                                                                                                                                                                                                                                                                                                                                                                                                                                                                                                                                                                                                                                                                                                                                                                                                                  |         |          |               |     |                                                                                           |               |              |                                                                                           |               |                 |                                                                                           |               |        |                                                                                           |               |                 |                                                                                           |               |        |                                                                                           |               |                 |                                                                                           |               |     |                                                                                           |               |                  |                                                                                           |               |                  |                                                                                           |               |                  |                                                                                           |               |                  |                                                                                           |               |           |                                                                                           |               |              |                                                                                           |               |

| Examination                                                                                                                           |                                               |                                                                                                                         |                                                                                                |                                            |                  |                                                                                                                                                                                                                                                                                                                                                                                                                                            |                                                                                                                                                                                                                                                                                                                                                                                                                                                                                                                                                                                                                                                                  |        |   |    |      |        |                |                 |              |                                           |                                            |                                              |                                               |                                          |                                           |                                         |                                        |  |
|---------------------------------------------------------------------------------------------------------------------------------------|-----------------------------------------------|-------------------------------------------------------------------------------------------------------------------------|------------------------------------------------------------------------------------------------|--------------------------------------------|------------------|--------------------------------------------------------------------------------------------------------------------------------------------------------------------------------------------------------------------------------------------------------------------------------------------------------------------------------------------------------------------------------------------------------------------------------------------|------------------------------------------------------------------------------------------------------------------------------------------------------------------------------------------------------------------------------------------------------------------------------------------------------------------------------------------------------------------------------------------------------------------------------------------------------------------------------------------------------------------------------------------------------------------------------------------------------------------------------------------------------------------|--------|---|----|------|--------|----------------|-----------------|--------------|-------------------------------------------|--------------------------------------------|----------------------------------------------|-----------------------------------------------|------------------------------------------|-------------------------------------------|-----------------------------------------|----------------------------------------|--|
| Vital Signs                                                                                                                           |                                               | Temp                                                                                                                    | °C                                                                                             | Resp Rate                                  | bpm              | HR                                                                                                                                                                                                                                                                                                                                                                                                                                         | /min                                                                                                                                                                                                                                                                                                                                                                                                                                                                                                                                                                                                                                                             | O2 Sat | % | BP | mmHg |        |                |                 |              |                                           |                                            |                                              |                                               |                                          |                                           |                                         |                                        |  |
| <b>General Examination</b>                                                                                                            |                                               |                                                                                                                         |                                                                                                |                                            |                  | <b>Abdomen</b><br><div style="text-align: center;"> 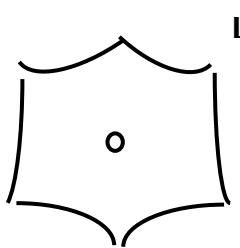 </div><br><b>Chest</b><br><div style="text-align: center;">  </div><br><div style="text-align: center;">  </div><br><b>CVS</b> |                                                                                                                                                                                                                                                                                                                                                                                                                                                                                                                                                                                                                                                                  |        |   |    |      |        |                |                 |              |                                           |                                            |                                              |                                               |                                          |                                           |                                         |                                        |  |
| Oral thrush Y <input type="checkbox"/> N <input type="checkbox"/> Lymph N > 1cm Y <input type="checkbox"/> N <input type="checkbox"/> |                                               |                                                                                                                         |                                                                                                |                                            |                  |                                                                                                                                                                                                                                                                                                                                                                                                                                            |                                                                                                                                                                                                                                                                                                                                                                                                                                                                                                                                                                                                                                                                  |        |   |    |      |        |                |                 |              |                                           |                                            |                                              |                                               |                                          |                                           |                                         |                                        |  |
| Finger Clubbing Y <input type="checkbox"/> N <input type="checkbox"/>                                                                 |                                               |                                                                                                                         |                                                                                                |                                            |                  |                                                                                                                                                                                                                                                                                                                                                                                                                                            |                                                                                                                                                                                                                                                                                                                                                                                                                                                                                                                                                                                                                                                                  |        |   |    |      |        |                |                 |              |                                           |                                            |                                              |                                               |                                          |                                           |                                         |                                        |  |
| <b>Eye signs of malnutrition?</b>                                                                                                     |                                               |                                                                                                                         |                                                                                                |                                            |                  |                                                                                                                                                                                                                                                                                                                                                                                                                                            |                                                                                                                                                                                                                                                                                                                                                                                                                                                                                                                                                                                                                                                                  |        |   |    |      |        |                |                 |              |                                           |                                            |                                              |                                               |                                          |                                           |                                         |                                        |  |
| Pus <input type="checkbox"/> ulceration <input type="checkbox"/> None <input type="checkbox"/>                                        |                                               |                                                                                                                         |                                                                                                |                                            |                  |                                                                                                                                                                                                                                                                                                                                                                                                                                            |                                                                                                                                                                                                                                                                                                                                                                                                                                                                                                                                                                                                                                                                  |        |   |    |      |        |                |                 |              |                                           |                                            |                                              |                                               |                                          |                                           |                                         |                                        |  |
| Jaundice                                                                                                                              |                                               | Y <input type="checkbox"/> N <input type="checkbox"/>                                                                   |                                                                                                |                                            |                  |                                                                                                                                                                                                                                                                                                                                                                                                                                            |                                                                                                                                                                                                                                                                                                                                                                                                                                                                                                                                                                                                                                                                  |        |   |    |      |        |                |                 |              |                                           |                                            |                                              |                                               |                                          |                                           |                                         |                                        |  |
| Oedema (tick all that apply)                                                                                                          |                                               | <input type="checkbox"/> None <input type="checkbox"/> Foot <input type="checkbox"/> Knee <input type="checkbox"/> Face |                                                                                                |                                            |                  |                                                                                                                                                                                                                                                                                                                                                                                                                                            |                                                                                                                                                                                                                                                                                                                                                                                                                                                                                                                                                                                                                                                                  |        |   |    |      |        |                |                 |              |                                           |                                            |                                              |                                               |                                          |                                           |                                         |                                        |  |
| <b>A</b>                                                                                                                              | Stridor                                       |                                                                                                                         | Y <input type="checkbox"/> N <input type="checkbox"/>                                          |                                            |                  |                                                                                                                                                                                                                                                                                                                                                                                                                                            |                                                                                                                                                                                                                                                                                                                                                                                                                                                                                                                                                                                                                                                                  |        |   |    |      |        |                |                 |              |                                           |                                            |                                              |                                               |                                          |                                           |                                         |                                        |  |
| <b>B</b>                                                                                                                              | Central Cyanosis                              |                                                                                                                         | Y <input type="checkbox"/> N <input type="checkbox"/>                                          |                                            |                  |                                                                                                                                                                                                                                                                                                                                                                                                                                            |                                                                                                                                                                                                                                                                                                                                                                                                                                                                                                                                                                                                                                                                  |        |   |    |      |        |                |                 |              |                                           |                                            |                                              |                                               |                                          |                                           |                                         |                                        |  |
|                                                                                                                                       | Indrawing                                     |                                                                                                                         | Y <input type="checkbox"/> N <input type="checkbox"/>                                          |                                            |                  |                                                                                                                                                                                                                                                                                                                                                                                                                                            |                                                                                                                                                                                                                                                                                                                                                                                                                                                                                                                                                                                                                                                                  |        |   |    |      |        |                |                 |              |                                           |                                            |                                              |                                               |                                          |                                           |                                         |                                        |  |
|                                                                                                                                       | Grunting                                      |                                                                                                                         | Y <input type="checkbox"/> N <input type="checkbox"/>                                          |                                            |                  |                                                                                                                                                                                                                                                                                                                                                                                                                                            |                                                                                                                                                                                                                                                                                                                                                                                                                                                                                                                                                                                                                                                                  |        |   |    |      |        |                |                 |              |                                           |                                            |                                              |                                               |                                          |                                           |                                         |                                        |  |
|                                                                                                                                       | Acidotic breathing                            |                                                                                                                         | Y <input type="checkbox"/> N <input type="checkbox"/>                                          |                                            |                  |                                                                                                                                                                                                                                                                                                                                                                                                                                            |                                                                                                                                                                                                                                                                                                                                                                                                                                                                                                                                                                                                                                                                  |        |   |    |      |        |                |                 |              |                                           |                                            |                                              |                                               |                                          |                                           |                                         |                                        |  |
|                                                                                                                                       | Wheeze                                        |                                                                                                                         | Y <input type="checkbox"/> N <input type="checkbox"/>                                          |                                            |                  |                                                                                                                                                                                                                                                                                                                                                                                                                                            |                                                                                                                                                                                                                                                                                                                                                                                                                                                                                                                                                                                                                                                                  |        |   |    |      |        |                |                 |              |                                           |                                            |                                              |                                               |                                          |                                           |                                         |                                        |  |
|                                                                                                                                       | Crackles                                      |                                                                                                                         | Y <input type="checkbox"/> N <input type="checkbox"/>                                          |                                            |                  |                                                                                                                                                                                                                                                                                                                                                                                                                                            |                                                                                                                                                                                                                                                                                                                                                                                                                                                                                                                                                                                                                                                                  |        |   |    |      |        |                |                 |              |                                           |                                            |                                              |                                               |                                          |                                           |                                         |                                        |  |
| <b>Circ &amp; Dehydr'n</b>                                                                                                            | Peripheral Pulse                              |                                                                                                                         | <input type="checkbox"/> Normal <input type="checkbox"/> Weak                                  |                                            |                  |                                                                                                                                                                                                                                                                                                                                                                                                                                            |                                                                                                                                                                                                                                                                                                                                                                                                                                                                                                                                                                                                                                                                  |        |   |    |      |        |                |                 |              |                                           |                                            |                                              |                                               |                                          |                                           |                                         |                                        |  |
|                                                                                                                                       | Cap Refill                                    |                                                                                                                         | secs                                                                                           |                                            | X = not possible |                                                                                                                                                                                                                                                                                                                                                                                                                                            |                                                                                                                                                                                                                                                                                                                                                                                                                                                                                                                                                                                                                                                                  |        |   |    |      |        |                |                 |              |                                           |                                            |                                              |                                               |                                          |                                           |                                         |                                        |  |
|                                                                                                                                       | Skin warm at:                                 |                                                                                                                         | <input type="checkbox"/> Hand <input type="checkbox"/> Elbow <input type="checkbox"/> Shoulder |                                            |                  |                                                                                                                                                                                                                                                                                                                                                                                                                                            |                                                                                                                                                                                                                                                                                                                                                                                                                                                                                                                                                                                                                                                                  |        |   |    |      |        |                |                 |              |                                           |                                            |                                              |                                               |                                          |                                           |                                         |                                        |  |
|                                                                                                                                       | Pallor / Anaemia                              |                                                                                                                         | 0 <input type="checkbox"/> + <input type="checkbox"/> +++ <input type="checkbox"/>             |                                            |                  |                                                                                                                                                                                                                                                                                                                                                                                                                                            |                                                                                                                                                                                                                                                                                                                                                                                                                                                                                                                                                                                                                                                                  |        |   |    |      |        |                |                 |              |                                           |                                            |                                              |                                               |                                          |                                           |                                         |                                        |  |
|                                                                                                                                       | Sunken eyes                                   |                                                                                                                         | Y <input type="checkbox"/> N <input type="checkbox"/>                                          |                                            |                  |                                                                                                                                                                                                                                                                                                                                                                                                                                            |                                                                                                                                                                                                                                                                                                                                                                                                                                                                                                                                                                                                                                                                  |        |   |    |      |        |                |                 |              |                                           |                                            |                                              |                                               |                                          |                                           |                                         |                                        |  |
|                                                                                                                                       | Skin pinch (sec)                              |                                                                                                                         | 0                                                                                              |                                            | 1                |                                                                                                                                                                                                                                                                                                                                                                                                                                            | ≥ 2                                                                                                                                                                                                                                                                                                                                                                                                                                                                                                                                                                                                                                                              |        |   |    |      |        |                |                 |              |                                           |                                            |                                              |                                               |                                          |                                           |                                         |                                        |  |
| <b>D</b>                                                                                                                              | <b>AVPU</b>                                   | <b>A</b>                                                                                                                | <b>V</b>                                                                                       | <b>P</b>                                   | <b>U</b>         |                                                                                                                                                                                                                                                                                                                                                                                                                                            |                                                                                                                                                                                                                                                                                                                                                                                                                                                                                                                                                                                                                                                                  |        |   |    |      |        |                |                 |              |                                           |                                            |                                              |                                               |                                          |                                           |                                         |                                        |  |
|                                                                                                                                       | Can drink / breastfeed?                       |                                                                                                                         | Y <input type="checkbox"/> N <input type="checkbox"/>                                          |                                            |                  |                                                                                                                                                                                                                                                                                                                                                                                                                                            | <b>Blantyre Coma Score=</b><br><table border="1" style="width:100%; border-collapse: collapse;"> <tr> <th>Motor response</th> <th>Verbal response</th> <th>Eye response</th> </tr> <tr> <td><input type="checkbox"/> Localises pain=2</td> <td><input type="checkbox"/> Normal response=2</td> <td><input type="checkbox"/> Following objects=1</td> </tr> <tr> <td><input type="checkbox"/> Withdraws to pain =1</td> <td><input type="checkbox"/> Inappropriate=1</td> <td><input type="checkbox"/> Not following =0</td> </tr> <tr> <td><input type="checkbox"/> No response =0</td> <td><input type="checkbox"/> No response=0</td> <td></td> </tr> </table> |        |   |    |      |        | Motor response | Verbal response | Eye response | <input type="checkbox"/> Localises pain=2 | <input type="checkbox"/> Normal response=2 | <input type="checkbox"/> Following objects=1 | <input type="checkbox"/> Withdraws to pain =1 | <input type="checkbox"/> Inappropriate=1 | <input type="checkbox"/> Not following =0 | <input type="checkbox"/> No response =0 | <input type="checkbox"/> No response=0 |  |
|                                                                                                                                       | Motor response                                | Verbal response                                                                                                         | Eye response                                                                                   |                                            |                  |                                                                                                                                                                                                                                                                                                                                                                                                                                            |                                                                                                                                                                                                                                                                                                                                                                                                                                                                                                                                                                                                                                                                  |        |   |    |      |        |                |                 |              |                                           |                                            |                                              |                                               |                                          |                                           |                                         |                                        |  |
|                                                                                                                                       | <input type="checkbox"/> Localises pain=2     | <input type="checkbox"/> Normal response=2                                                                              | <input type="checkbox"/> Following objects=1                                                   |                                            |                  |                                                                                                                                                                                                                                                                                                                                                                                                                                            |                                                                                                                                                                                                                                                                                                                                                                                                                                                                                                                                                                                                                                                                  |        |   |    |      |        |                |                 |              |                                           |                                            |                                              |                                               |                                          |                                           |                                         |                                        |  |
|                                                                                                                                       | <input type="checkbox"/> Withdraws to pain =1 | <input type="checkbox"/> Inappropriate=1                                                                                | <input type="checkbox"/> Not following =0                                                      |                                            |                  |                                                                                                                                                                                                                                                                                                                                                                                                                                            |                                                                                                                                                                                                                                                                                                                                                                                                                                                                                                                                                                                                                                                                  |        |   |    |      |        |                |                 |              |                                           |                                            |                                              |                                               |                                          |                                           |                                         |                                        |  |
| <input type="checkbox"/> No response =0                                                                                               | <input type="checkbox"/> No response=0        |                                                                                                                         |                                                                                                |                                            |                  |                                                                                                                                                                                                                                                                                                                                                                                                                                            |                                                                                                                                                                                                                                                                                                                                                                                                                                                                                                                                                                                                                                                                  |        |   |    |      |        |                |                 |              |                                           |                                            |                                              |                                               |                                          |                                           |                                         |                                        |  |
| Stiff neck                                                                                                                            |                                               | Y <input type="checkbox"/> N <input type="checkbox"/>                                                                   |                                                                                                |                                            |                  |                                                                                                                                                                                                                                                                                                                                                                                                                                            |                                                                                                                                                                                                                                                                                                                                                                                                                                                                                                                                                                                                                                                                  |        |   |    |      |        |                |                 |              |                                           |                                            |                                              |                                               |                                          |                                           |                                         |                                        |  |
| Bulging fontanelle                                                                                                                    |                                               | Y <input type="checkbox"/> N <input type="checkbox"/>                                                                   |                                                                                                |                                            |                  |                                                                                                                                                                                                                                                                                                                                                                                                                                            |                                                                                                                                                                                                                                                                                                                                                                                                                                                                                                                                                                                                                                                                  |        |   |    |      |        |                |                 |              |                                           |                                            |                                              |                                               |                                          |                                           |                                         |                                        |  |
| Can sit without support during this illness                                                                                           |                                               | Y <input type="checkbox"/> N <input type="checkbox"/>                                                                   |                                                                                                |                                            |                  |                                                                                                                                                                                                                                                                                                                                                                                                                                            |                                                                                                                                                                                                                                                                                                                                                                                                                                                                                                                                                                                                                                                                  |        |   |    |      |        |                |                 |              |                                           |                                            |                                              |                                               |                                          |                                           |                                         |                                        |  |
| <b>Infant &lt; 1yr</b>                                                                                                                | Irritable                                     |                                                                                                                         | Y <input type="checkbox"/> N <input type="checkbox"/>                                          |                                            |                  |                                                                                                                                                                                                                                                                                                                                                                                                                                            |                                                                                                                                                                                                                                                                                                                                                                                                                                                                                                                                                                                                                                                                  |        |   |    |      |        |                |                 |              |                                           |                                            |                                              |                                               |                                          |                                           |                                         |                                        |  |
|                                                                                                                                       | Reduced movement / tone                       |                                                                                                                         | Y <input type="checkbox"/> N <input type="checkbox"/>                                          |                                            |                  |                                                                                                                                                                                                                                                                                                                                                                                                                                            |                                                                                                                                                                                                                                                                                                                                                                                                                                                                                                                                                                                                                                                                  |        |   |    |      |        |                |                 |              |                                           |                                            |                                              |                                               |                                          |                                           |                                         |                                        |  |
|                                                                                                                                       | Umbilicus                                     | Normal<br><input type="checkbox"/>                                                                                      | Pus<br><input type="checkbox"/>                                                                | Pus & red skin<br><input type="checkbox"/> |                  |                                                                                                                                                                                                                                                                                                                                                                                                                                            |                                                                                                                                                                                                                                                                                                                                                                                                                                                                                                                                                                                                                                                                  |        |   |    |      |        |                |                 |              |                                           |                                            |                                              |                                               |                                          |                                           |                                         |                                        |  |
|                                                                                                                                       |                                               |                                                                                                                         |                                                                                                |                                            |                  | <b>Posture (tick that apply)</b><br><table border="1" style="width:100%; border-collapse: collapse;"> <tr> <th>Normal</th> <th>Opisthotonus</th> <th>Decerebrate</th> <th>Decorticate</th> </tr> <tr> <td><input type="checkbox"/></td> <td><input type="checkbox"/></td> <td><input type="checkbox"/></td> <td><input type="checkbox"/></td> </tr> </table>                                                                               |                                                                                                                                                                                                                                                                                                                                                                                                                                                                                                                                                                                                                                                                  |        |   |    |      | Normal | Opisthotonus   | Decerebrate     | Decorticate  | <input type="checkbox"/>                  | <input type="checkbox"/>                   | <input type="checkbox"/>                     | <input type="checkbox"/>                      |                                          |                                           |                                         |                                        |  |
| Normal                                                                                                                                | Opisthotonus                                  | Decerebrate                                                                                                             | Decorticate                                                                                    |                                            |                  |                                                                                                                                                                                                                                                                                                                                                                                                                                            |                                                                                                                                                                                                                                                                                                                                                                                                                                                                                                                                                                                                                                                                  |        |   |    |      |        |                |                 |              |                                           |                                            |                                              |                                               |                                          |                                           |                                         |                                        |  |
| <input type="checkbox"/>                                                                                                              | <input type="checkbox"/>                      | <input type="checkbox"/>                                                                                                | <input type="checkbox"/>                                                                       |                                            |                  |                                                                                                                                                                                                                                                                                                                                                                                                                                            |                                                                                                                                                                                                                                                                                                                                                                                                                                                                                                                                                                                                                                                                  |        |   |    |      |        |                |                 |              |                                           |                                            |                                              |                                               |                                          |                                           |                                         |                                        |  |
|                                                                                                                                       |                                               |                                                                                                                         |                                                                                                |                                            |                  | <b>Blood/tea/cola coloured urine observed?</b><br>Y <input type="checkbox"/> N <input type="checkbox"/> Urine not seen <input type="checkbox"/>                                                                                                                                                                                                                                                                                            |                                                                                                                                                                                                                                                                                                                                                                                                                                                                                                                                                                                                                                                                  |        |   |    |      |        |                |                 |              |                                           |                                            |                                              |                                               |                                          |                                           |                                         |                                        |  |
|                                                                                                                                       |                                               |                                                                                                                         |                                                                                                |                                            |                  | <b>Bones &amp; Joints</b><br>Wrist / Rib signs Rickets Y <input type="checkbox"/> N <input type="checkbox"/>                                                                                                                                                                                                                                                                                                                               |                                                                                                                                                                                                                                                                                                                                                                                                                                                                                                                                                                                                                                                                  |        |   |    |      |        |                |                 |              |                                           |                                            |                                              |                                               |                                          |                                           |                                         |                                        |  |
